# Supplementary material
Source: MDPI journal article supplement (https://www.mdpi.com/1996-1073/14/14/4226)
Supplement: s1 [file s1]

# A Phenomenological Model of a Downdraft Biomass Gasifier Flexible to the Feedstock Composition and the Reactor Design

The following are the stoichiometric coefficients of the devolatilization reaction, obtained from the balance equations of the products yields [20]:

$$\alpha_2 = \eta_W \cdot (100 - A) / 12 \quad (S1)$$

$$a = \eta_{H_2} \cdot (100 - A) / 2 \quad (S2)$$

$$b = \eta_{CH_4} \cdot (100 - A) / 16 \quad (S3)$$

$$c = \eta_{CO} \cdot (100 - A) / 28 \quad (S4)$$

$$d = \eta_{H_2O} \cdot (100 - A) / 18 \quad (S5)$$

$$e = (\gamma_1 - c - d) / 2 \quad (S6)$$

$$f = \varepsilon_1 \quad (S7)$$

$$g = 0.5 \cdot \delta_1 \quad (S8)$$

$$m = \alpha_1 - \alpha_2 - b - c - e \quad (S9)$$

$$n = \beta_1 - 2a - 4b - 2d - 2f \quad (S10)$$

where the devolatilization yields  $\eta_i$  are obtained from literature data [20] while  $\alpha_1$ ,  $\beta_1$ ,  $\gamma_1$ ,  $\delta_1$ ,  $\varepsilon_1$  derive from the brute biomass formula:

$$\alpha_1 = 1 \quad (S10\ a)$$

$$\beta_1 = (y_H \cdot M_C) / (y_C \cdot M_H); \quad (S10\ b)$$

$$\gamma_1 = (y_O \cdot M_C) / (y_C \cdot M_O) \quad (S10\ c)$$

$$\delta_1 = (y_N \cdot M_C) / (y_C \cdot M_N) \quad (S10\ d)$$

$$\varepsilon_1 = (y_S \cdot M_C) / (y_C \cdot M_S) \quad (S10\ e)$$

being  $y_i$  and  $M_i$  respectively the species mass fraction and molecular mass.

The devolatilization kinetic rates used as right-hand term in each of the eqs. (6 – 14) are reported in Table S1, while the kinetic constants in Table S2 are expressed as a function of the Reynolds and Schmidt number of each species, while  $D_i$  expresses the species diffusivity coefficient.

**Table S1.** Devolatilization products kinetic rates used within the present model.

|            |                                               |                        |
|------------|-----------------------------------------------|------------------------|
| $R_{char}$ | $2 \cdot (M_C / M_{coal}) \cdot R_{dev}$      | kg/(m <sup>3</sup> ·s) |
| $R_{H_2}$  | $a \cdot (M_{H_2} / M_{coal}) \cdot R_{dev}$  | kg/(m <sup>3</sup> ·s) |
| $R_{CH_4}$ | $b \cdot (M_{CH_4} / M_{coal}) \cdot R_{dev}$ | kg/(m <sup>3</sup> ·s) |
| $R_{CO}$   | $c \cdot (M_{CO} / M_{coal}) \cdot R_{dev}$   | kg/(m <sup>3</sup> ·s) |
| $R_{TAR}$  | $(M_{CmHn} / M_{coal}) \cdot R_{dev}$         | kg/(m <sup>3</sup> ·s) |
| $R_{H_2O}$ | $d \cdot (M_{H_2O} / M_{coal}) \cdot R_{dev}$ | kg/(m <sup>3</sup> ·s) |
| $R_{CO_2}$ | $e \cdot (M_{CO_2} / M_{coal}) \cdot R_{dev}$ | kg/(m <sup>3</sup> ·s) |
| $R_{H_2S}$ | $f \cdot (M_{H_2S} / M_{coal}) \cdot R_{dev}$ | kg/(m <sup>3</sup> ·s) |
| $R_{N_2}$  | $g \cdot (M_{N_2} / M_{coal}) \cdot R_{dev}$  | kg/(m <sup>3</sup> ·s) |

**Table S2.** Kinetic constants used in the present model [22].

|           |                                                   |                                                                                                       |
|-----------|---------------------------------------------------|-------------------------------------------------------------------------------------------------------|
| <b>P1</b> | $k_{\text{diff},\text{O}_2} [\text{m/s}]$         | $D_{\text{O}_2} \cdot [(2 + 1.1 \cdot \text{Re}^{0.6} \cdot \text{Sc}^{0.33})/d_{\text{p}0}]$         |
|           | $k_{\text{ash},\text{O}_2} [\text{m/s}]$          | $2 \cdot D_{\text{O}_2} \cdot \varepsilon^{2.5}/d_{\text{p}0}$                                        |
|           | $k_{\text{reaz},\text{O}_2} [\text{m/s}]$         | $2.3 \cdot T_s \cdot \exp(-11100/T_s)$                                                                |
| <b>P2</b> | $k_{\text{diff},\text{CO}_2} [\text{m/s}]$        | $D_{\text{CO}_2} \cdot [(2 + 1.1 \cdot \text{Re}^{0.6} \cdot \text{Sc}^{0.33})/d_{\text{p}0}]$        |
|           | $k_{\text{ash},\text{CO}_2} [\text{m/s}]$         | $2 \cdot D_{\text{CO}_2} \cdot \varepsilon^{2.5}/d_{\text{p}0}$                                       |
|           | $k_{\text{reaz},\text{CO}_2} [\text{m/s}]$        | $589 \cdot T_s \cdot \exp(-26800/T_s)$                                                                |
| <b>P3</b> | $k_{\text{diff},\text{H}_2\text{O}} [\text{m/s}]$ | $D_{\text{H}_2\text{O}} \cdot [(2 + 1.1 \cdot \text{Re}^{0.6} \cdot \text{Sc}^{0.33})/d_{\text{p}0}]$ |
|           | $k_{\text{ash},\text{H}_2\text{O}} [\text{m/s}]$  | $2 \cdot D_{\text{H}_2\text{O}} \cdot \varepsilon^{2.5}/d_{\text{p}0}$                                |
|           | $k_{\text{reaz},\text{H}_2\text{O}} [\text{m/s}]$ | $k_{\text{reaz},\text{CO}_2}$                                                                         |
| <b>P4</b> | $k_{\text{diff},\text{H}_2} [\text{m/s}]$         | $D_{\text{H}_2} \cdot [(2 + 1.1 \cdot \text{Re}^{0.6} \cdot \text{Sc}^{0.33})/d_{\text{p}0}]$         |
|           | $k_{\text{ash},\text{H}_2} [\text{m/s}]$          | $2 \cdot D_{\text{H}_2} \cdot \varepsilon^{2.5}/d_{\text{p}0}$                                        |
|           | $k_{\text{reaz},\text{H}_2} [\text{m/s}]$         | $k_{\text{reaz},\text{CO}_2} \cdot 10^{-3}$                                                           |
